# Supplementary material for: Global morphogenetic flow is accurately predicted by the spatial distribution of myosin motors
Source: eLife journal article supplement (doi:10.7554/elife.27454), 2018-02-09

# Parametrization of projection line

$$\begin{pmatrix} x(t) \\ y(t) \end{pmatrix} = \begin{pmatrix} t \sin(\alpha) + \delta \cos(\alpha) \\ -t \cos(\alpha) + \delta \sin(\alpha) \end{pmatrix}$$

Distance  $\delta_{\text{Origin}} = 0$

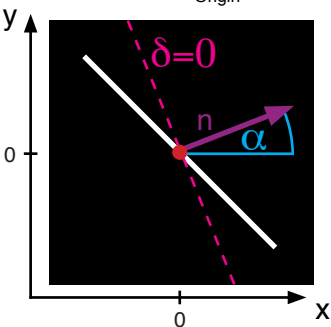

Distance  $\delta_{\text{Origin}} \neq 0$

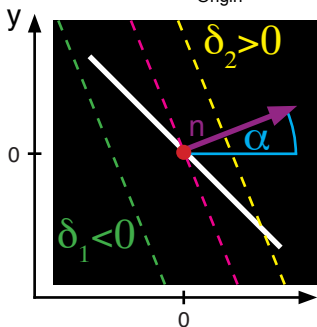

Radon transformed

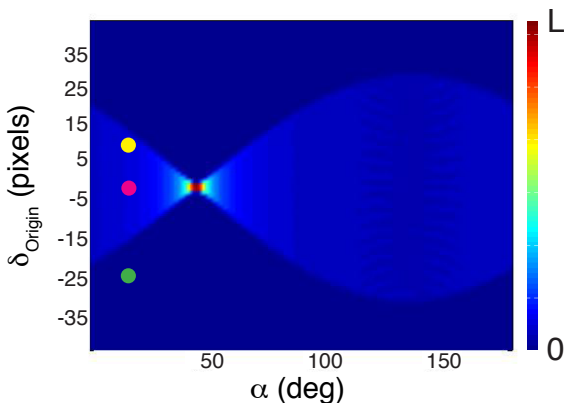

Supplement: supp [file elife-27454-supp-v1.zip]
