# Supplementary material for: Global morphogenetic flow is accurately predicted by the spatial distribution of myosin motors
Source: eLife journal article supplement (doi:10.7554/elife.27454), 2018-02-09
Supplement: supp [file elife-27454-supp-v1.zip]

a

'Cut' model for ventral furrow formation

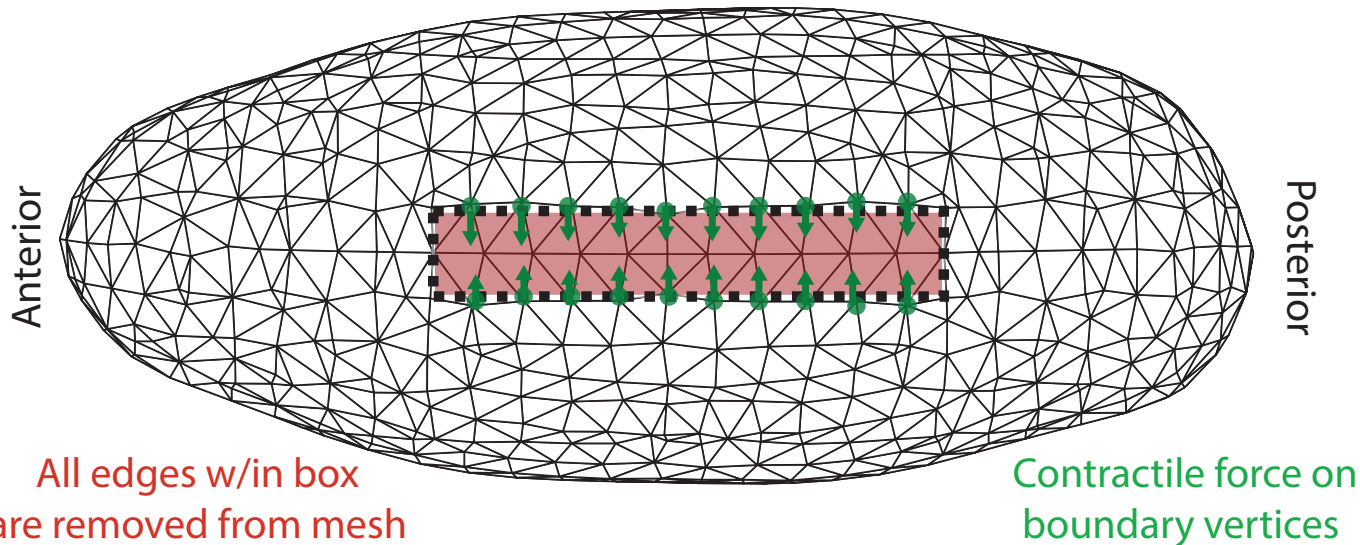

b

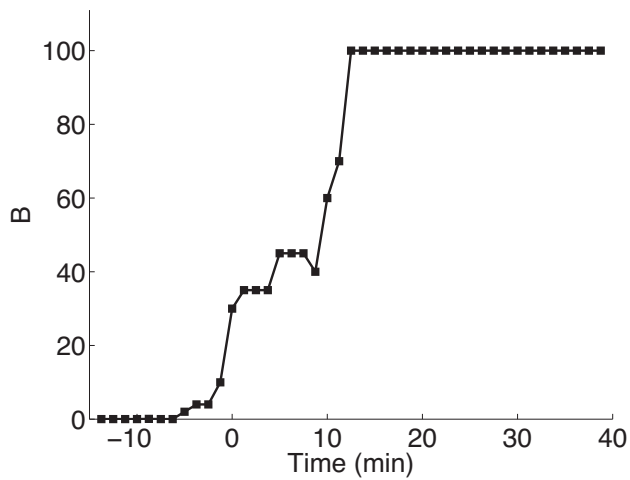

c

$$\partial_a^2 v_b(x) + B(t) \partial_b [\partial_a v_a(x)]$$

$$= \beta \partial_b m_{basal}(x) + \alpha \partial_a m_{ab, apical}(x)$$

**Model parameters:**

$B(t)$  : Time dependent, but not space dependent. Dimensionless  
 $B(35min) = 100, (56, 25000)$

$\alpha = 1, (0.6, 3.7), \beta = 50, (11.5, 80.3)$  :  
 Conversion factors, in arbitrary units  
 no spatiotemporal dependence.
