# Supplementary material for: Global morphogenetic flow is accurately predicted by the spatial distribution of myosin motors
Source: eLife journal article supplement (doi:10.7554/elife.27454), 2018-02-09
Supplement: supp [file elife-27454-supp-v1.zip]

Figure 3 displays time-lapse microscopy images of *sqh-GFP* expression in *Drosophila* embryos, showing the progression of the dorsal-ventral axis. The images are arranged in a 3x6 grid, with rows representing time points  $T = -6$  min,  $T = 0$  min, and  $T = 6$  min. The columns show different views: a large dorsal view, a smaller dorsal view, and a lateral view. The *sqh-GFP* signal is visualized as grayscale patterns. A dashed white box in the dorsal views and a solid red box in the lateral views indicate the regions of interest. The  $C_{rms}$  values are provided for each time point:  $T = -6$  min ( $C_{rms} = 0.57$ ),  $T = 0$  min ( $C_{rms} = 0.24$ ),  $T = 6$  min ( $C_{rms} = 0.16$ ),  $T = 11$  min ( $C_{rms} = 0.15$ ),  $T = 17$  min ( $C_{rms} = 0.11$ ), and  $T = 24$  min ( $C_{rms} = 0.09$ ). A 100  $\mu\text{m}$  scale bar is shown in the top left of each row. The *sqh-GFP* label is present in the bottom left of each panel.
