# Supplementary material for: Global morphogenetic flow is accurately predicted by the spatial distribution of myosin motors
Source: eLife journal article supplement (doi:10.7554/elife.27454), 2018-02-09
Supplement: supp [file elife-27454-supp-v1.zip]

Archive with 14 entries (14 files):
- elife_poa_e27454_Figure_1_figure_supplement_5.pdf
- elife_poa_e27454_Figure_1_figure_supplement_4.pdf
- elife_poa_e27454_Figure_1_figure_supplement_1.pdf
- elife_poa_e27454_Figure_2_figure_supplement_3.pdf
- elife_poa_e27454_Transparent_Reporting_File.docx
- elife_poa_e27454_Figure_4_figure_supplement_1.pdf
- elife_poa_e27454_Figure_1_figure_supplement_2.pdf
- elife_poa_e27454_Figure_1_figure_supplement_3.pdf
- elife_poa_e27454_Figure_1_figure_supplement_7.pdf
- elife_poa_e27454_Figure_1_figure_supplement_6.pdf
- elife_poa_e27454_Figure_2_figure_supplement_4.pdf
- elife_poa_e27454_Figure_3_figure_supplement_1.pdf
- elife_poa_e27454_Figure_2_figure_supplement_1.pdf
- elife_poa_e27454_Figure_2_figure_supplement_2.pdf
