# Supplementary material for: Global morphogenetic flow is accurately predicted by the spatial distribution of myosin motors
Source: eLife journal article supplement (doi:10.7554/elife.27454), 2018-02-09
Supplement: supp [file elife-27454-supp-v1.zip › elife_poa_e27454_Figure_2_figure_supplement_3.pdf]

a

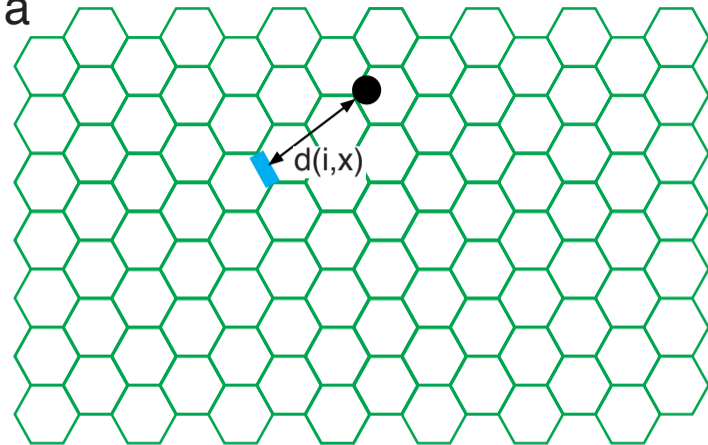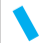

Edge i

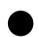

Point x on mesoscale

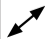 $d(i,x)$  = distance to edge i from point x

b

Convolution with gaussian kernel to obtain smooth myosin tensor at mesoscale

$$\overleftrightarrow{m}(\vec{x}) = \sum_i w(\vec{x}, i) \overleftrightarrow{m}(i)$$

$$w(\vec{x}, i) = \frac{1}{4\pi\sigma} e^{-\left(\frac{d(i, \vec{x})}{\sigma}\right)^2}$$

$\sigma = 5$  cell diameters

Tensor decomposition in trace and traceless part, separates isotropic from anisotropic pool

$$\overleftrightarrow{m}(\vec{x}) = m(\vec{x})\mathbb{I} + \overleftrightarrow{\tilde{m}}(\vec{x})$$

$$m(\vec{x}) = \text{tr}(\overleftrightarrow{m}(\vec{x}))/2$$

$$\overleftrightarrow{\tilde{m}}(\vec{x}) = \overleftrightarrow{m}(\vec{x}) - m(\vec{x})\mathbb{I}$$
