# Supplementary figures and images for: Global morphogenetic flow is accurately predicted by the spatial distribution of myosin motors
Source: eLife journal article supplement (doi:10.7554/elife.27454), 2018-02-09

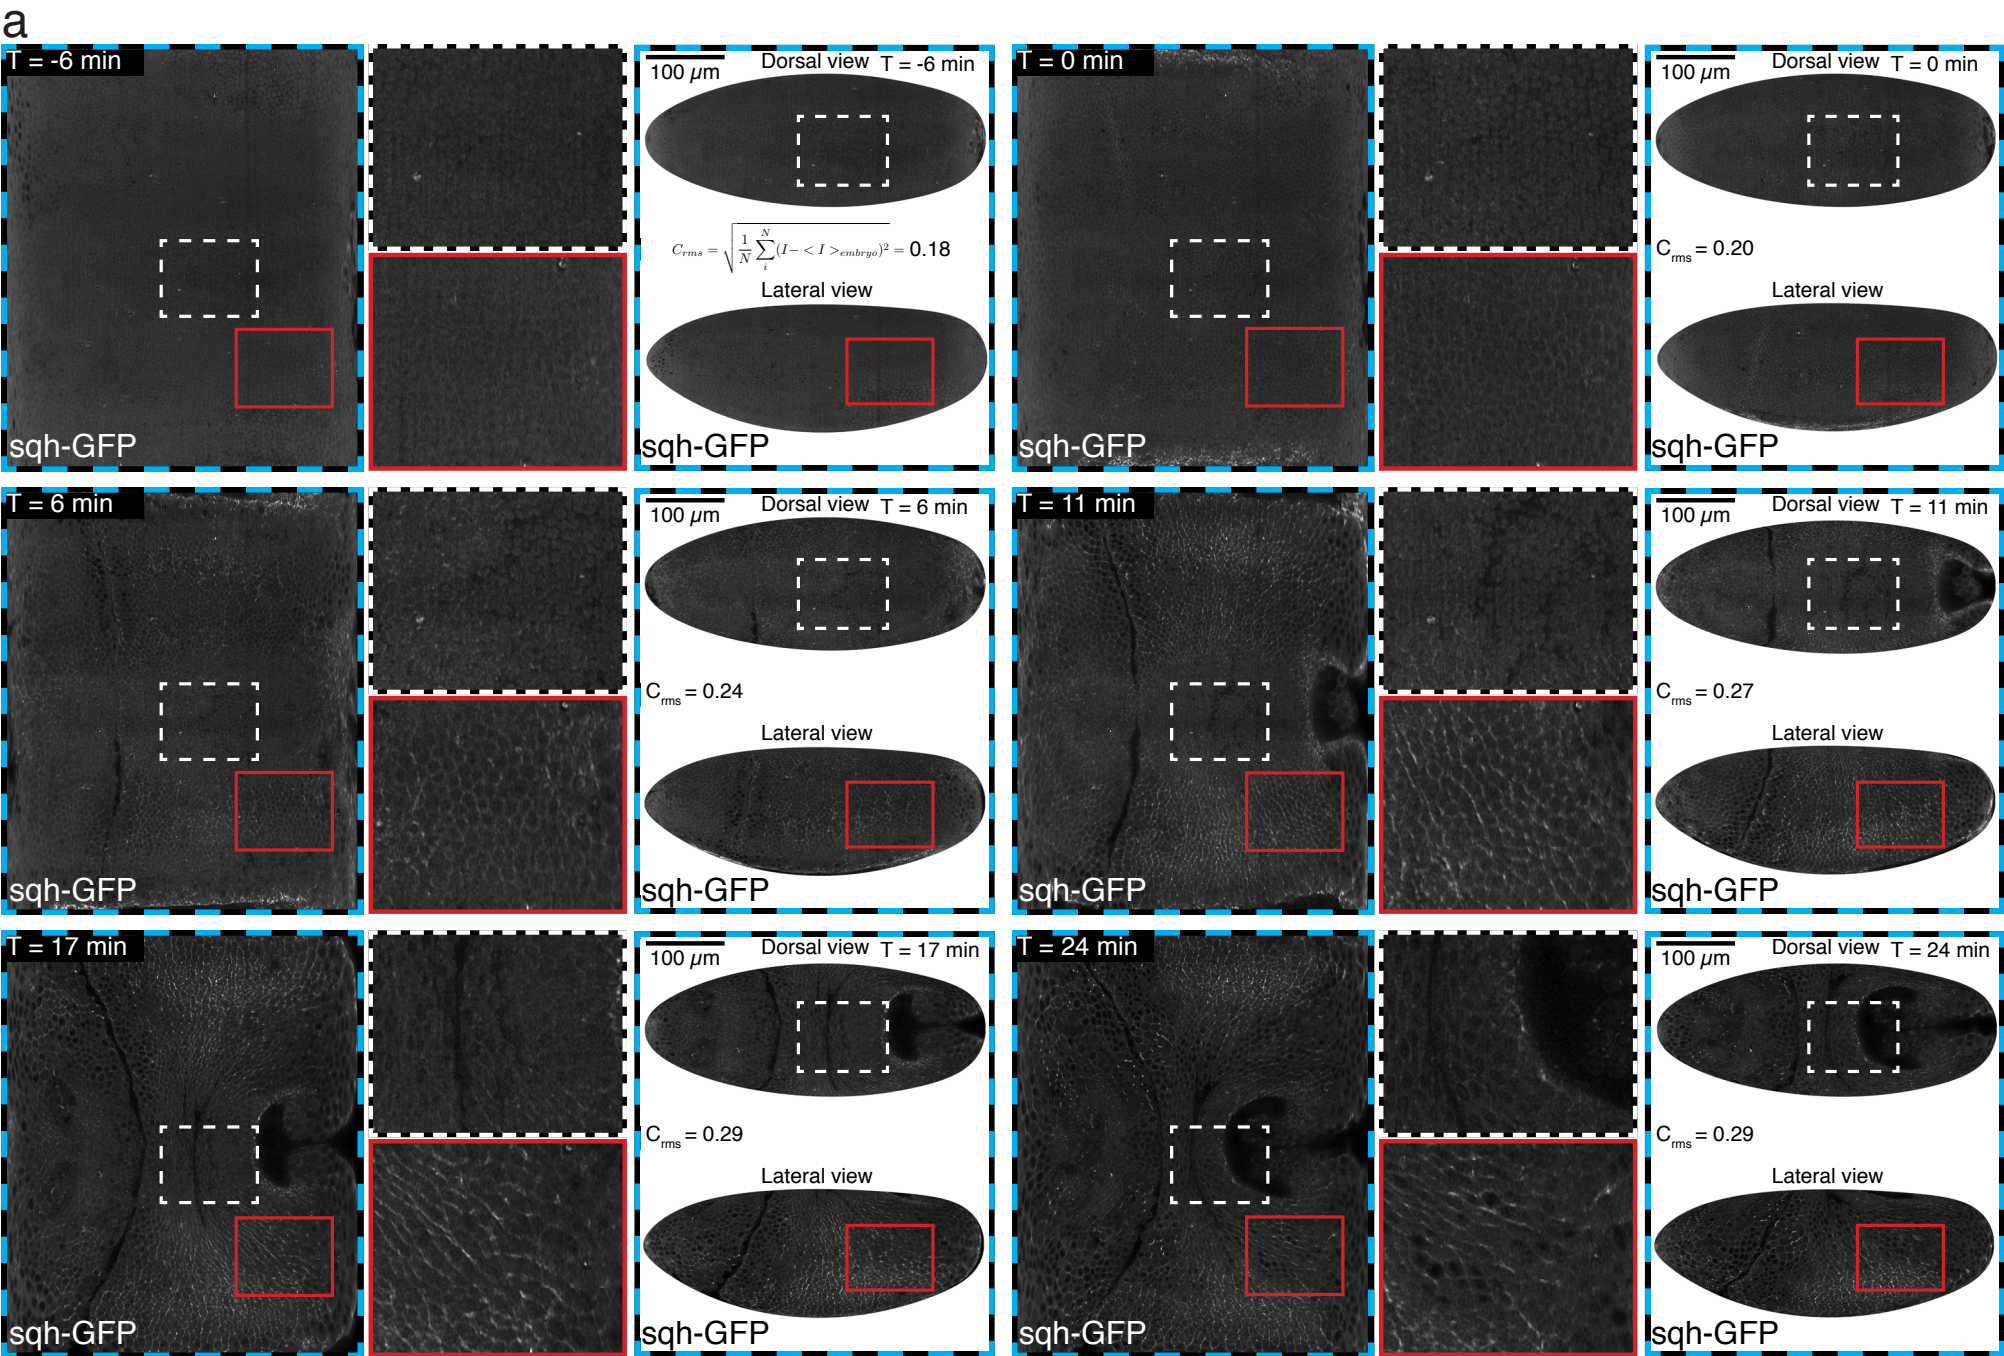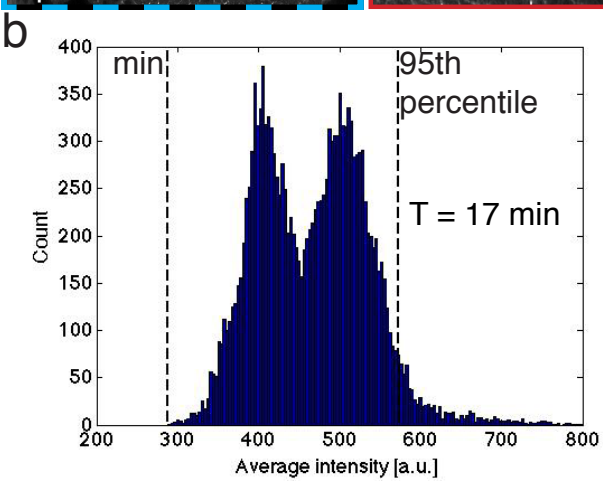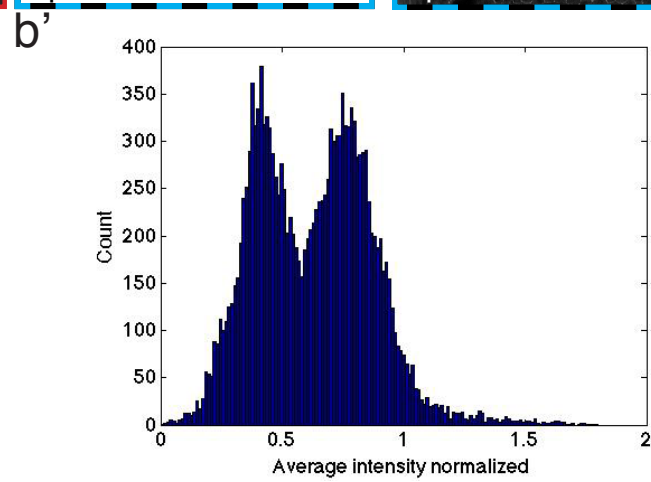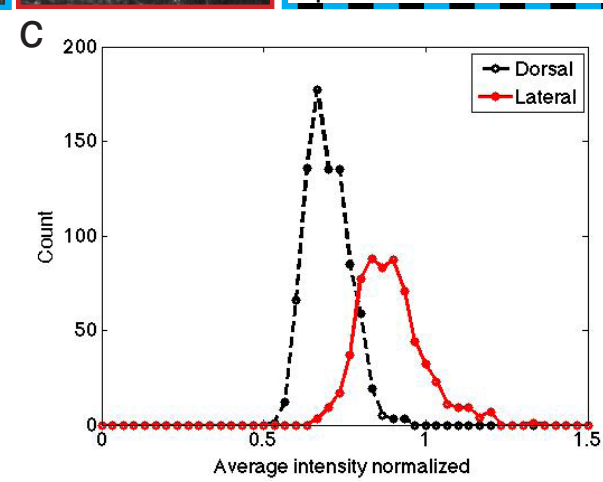

Supplement: supp [file elife-27454-supp-v1.zip]

**a**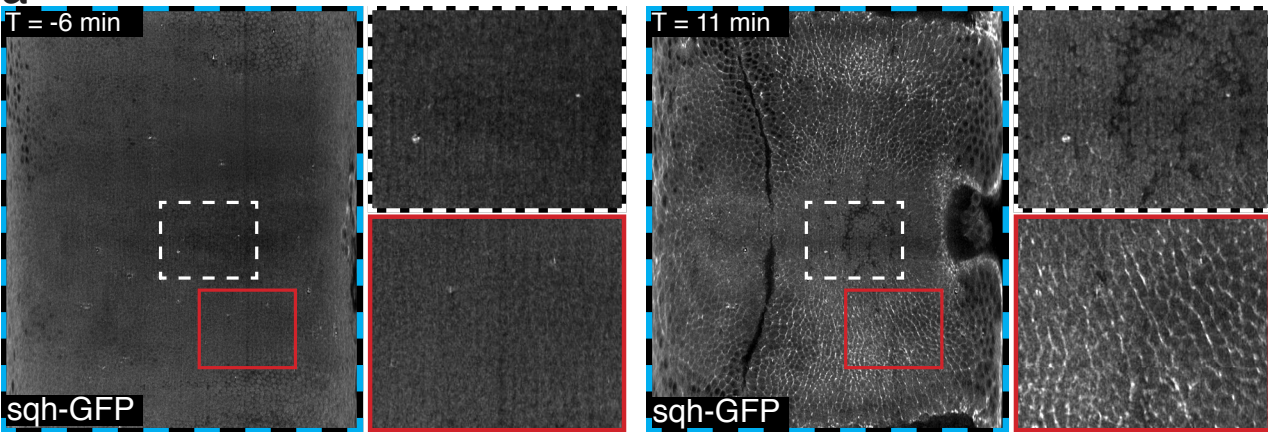**b**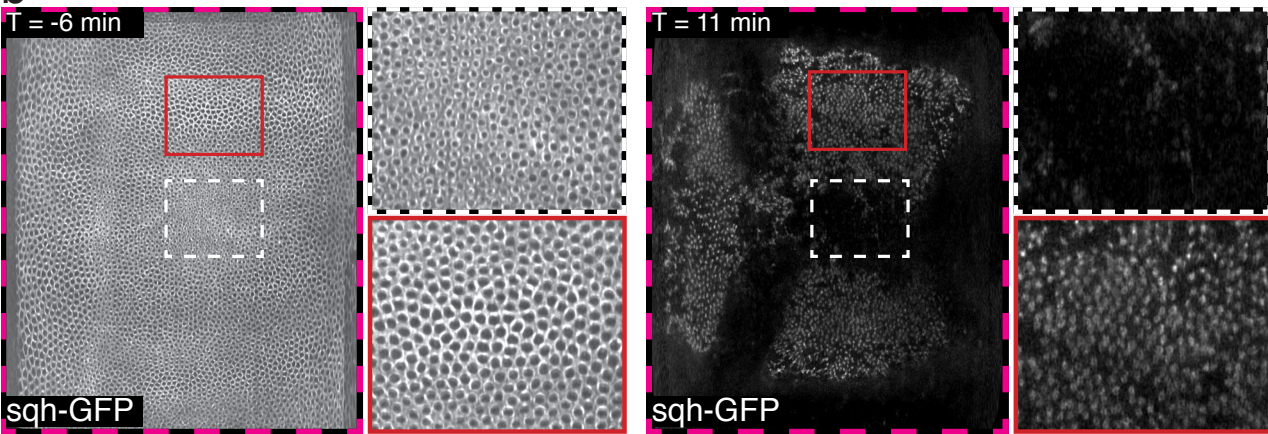

Supplement: supp [file elife-27454-supp-v1.zip]

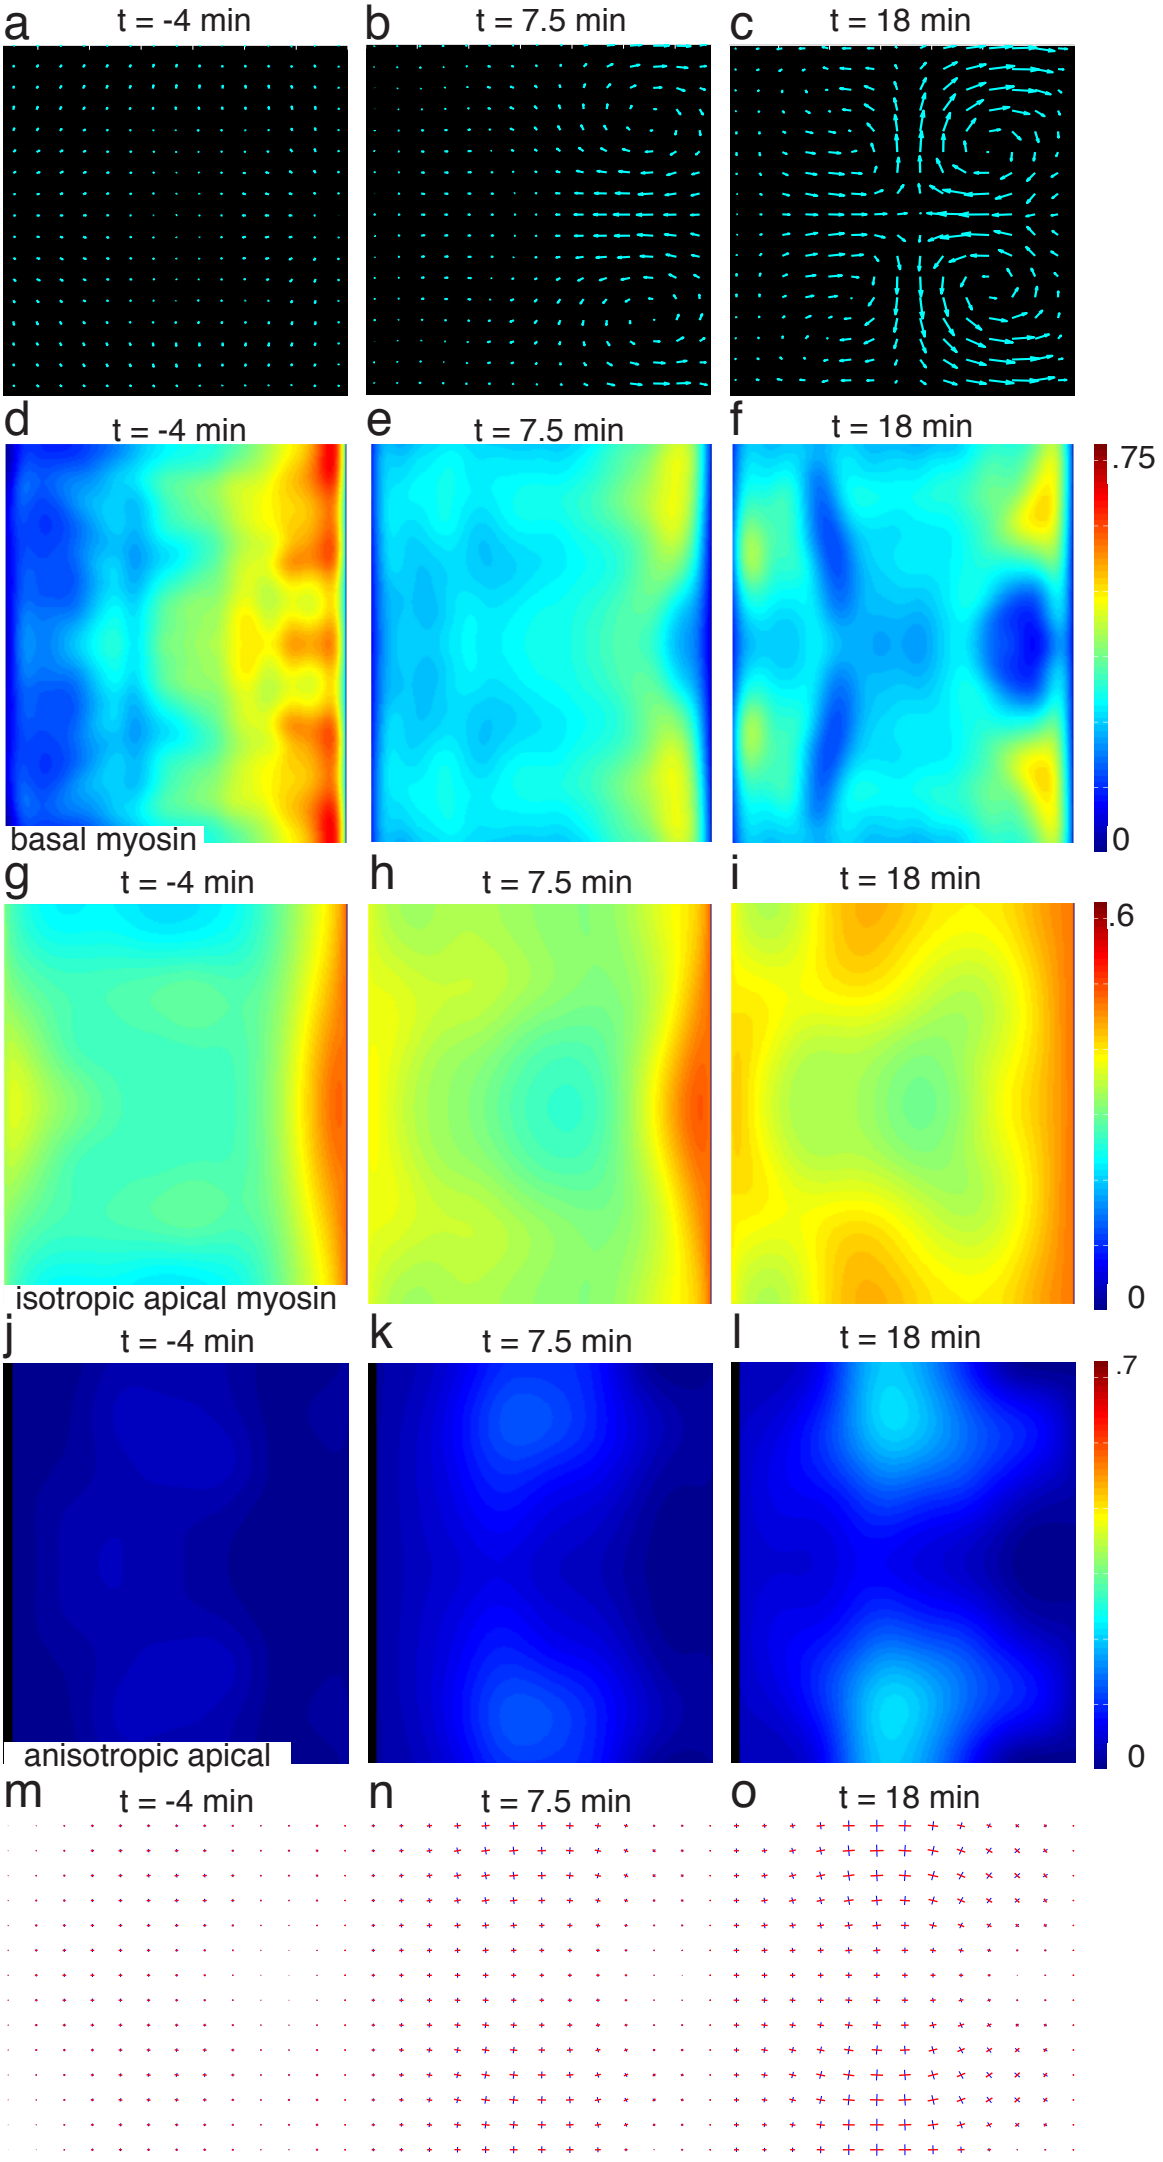

Supplement: supp [file elife-27454-supp-v1.zip]

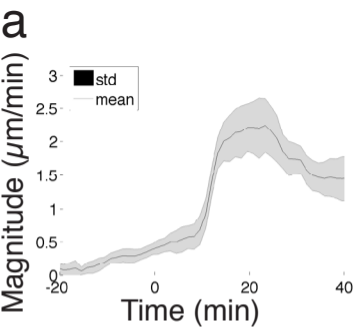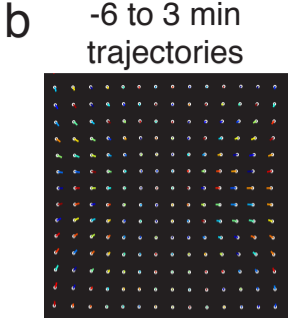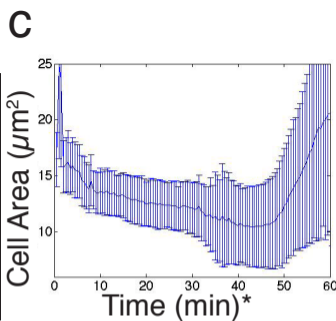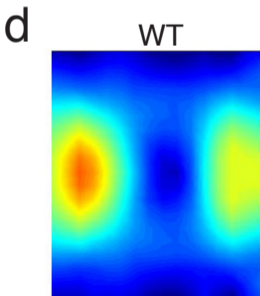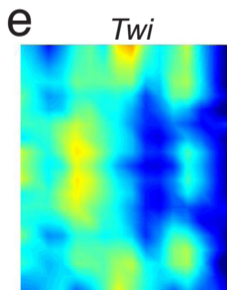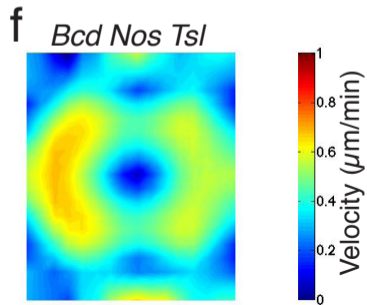

Supplement: supp [file elife-27454-supp-v1.zip]

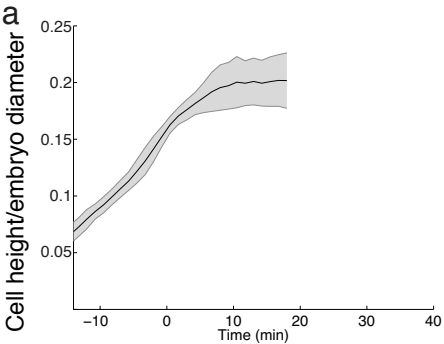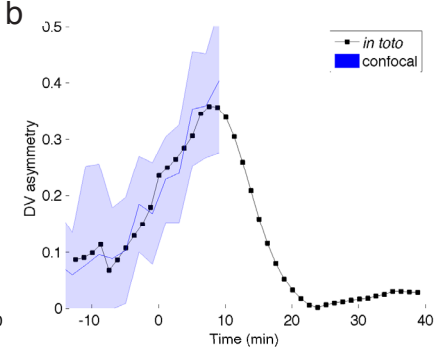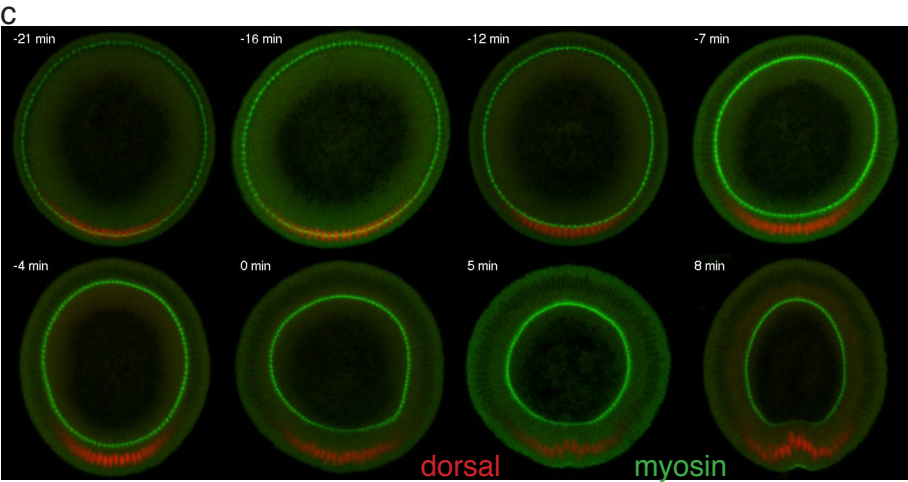

Supplement: supp [file elife-27454-supp-v1.zip]

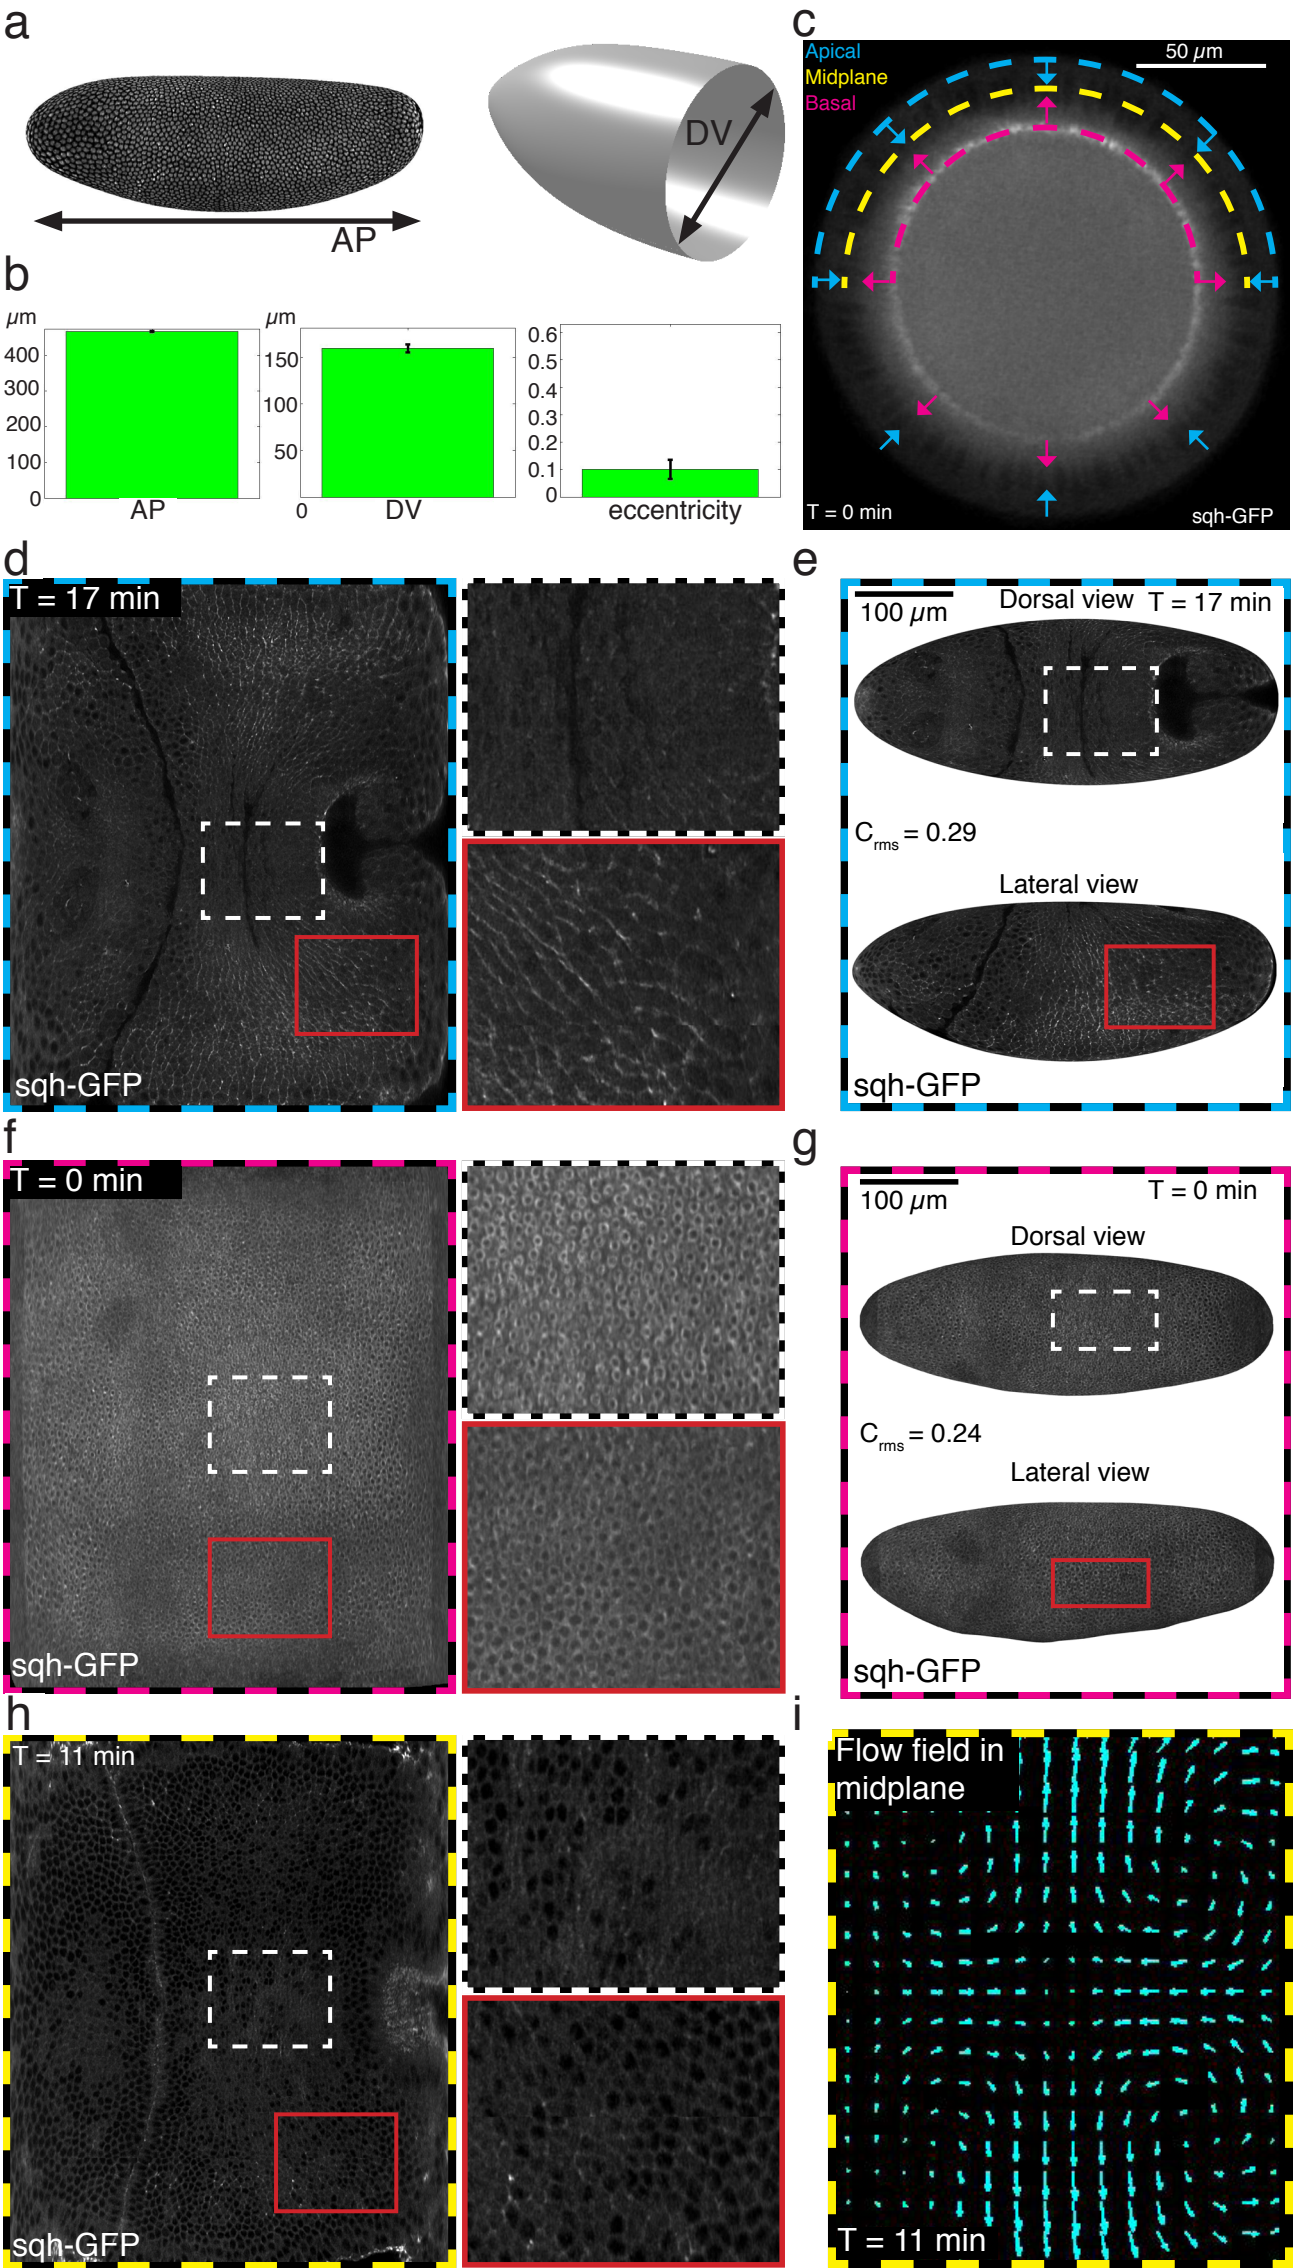

Supplement: supp [file elife-27454-supp-v1.zip]

a

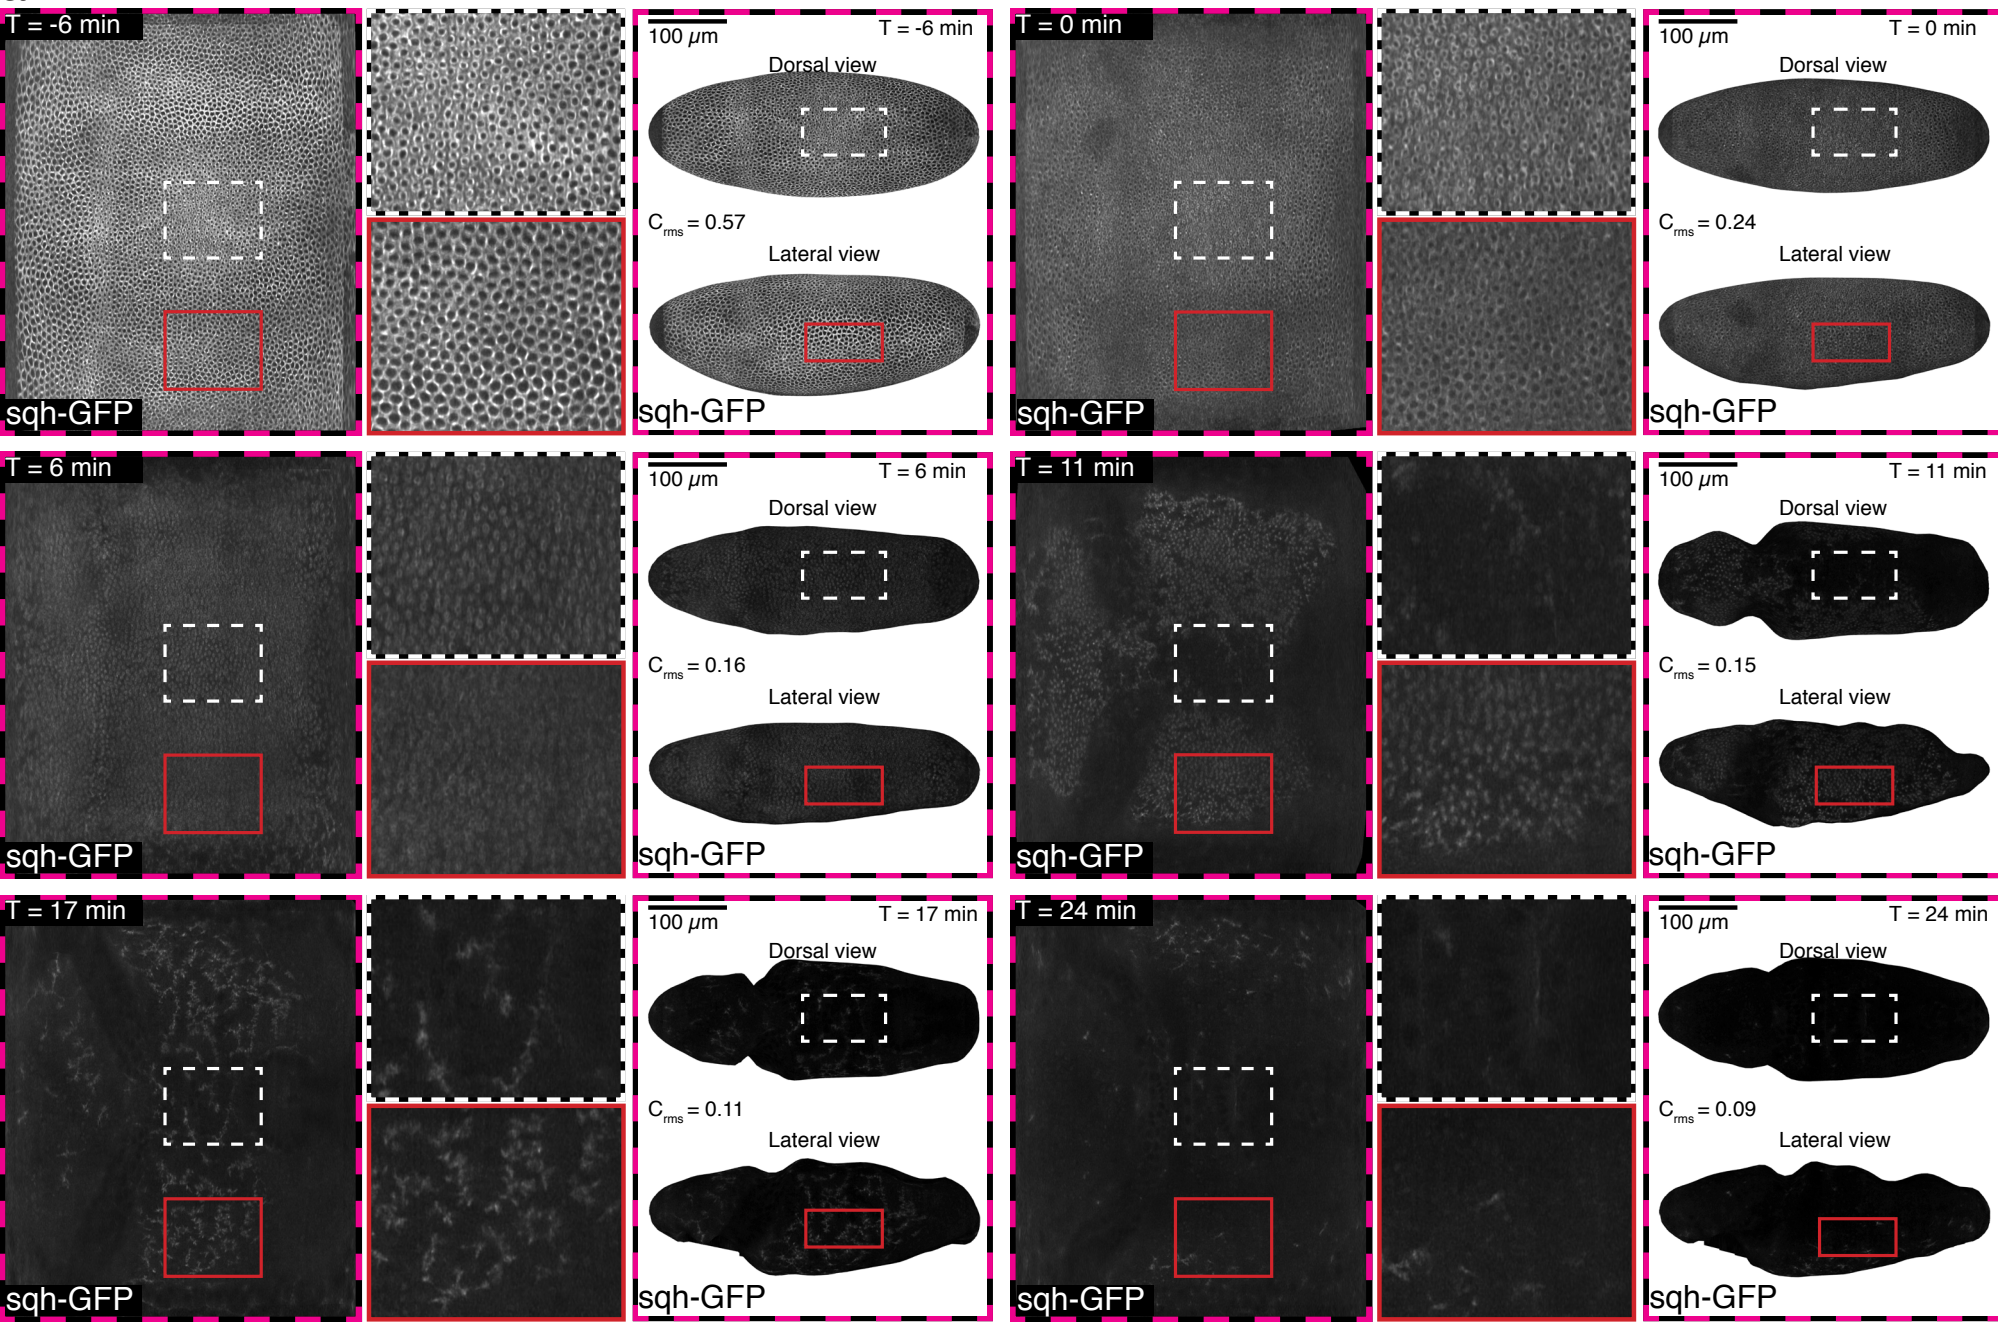

Supplement: supp [file elife-27454-supp-v1.zip › elife_poa_e27454_Figure_1_figure_supplement_3.pdf]

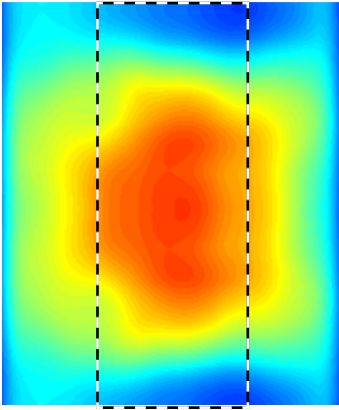

Supplement: supp [file elife-27454-supp-v1.zip › elife_poa_e27454_Figure_1_figure_supplement_6.pdf]

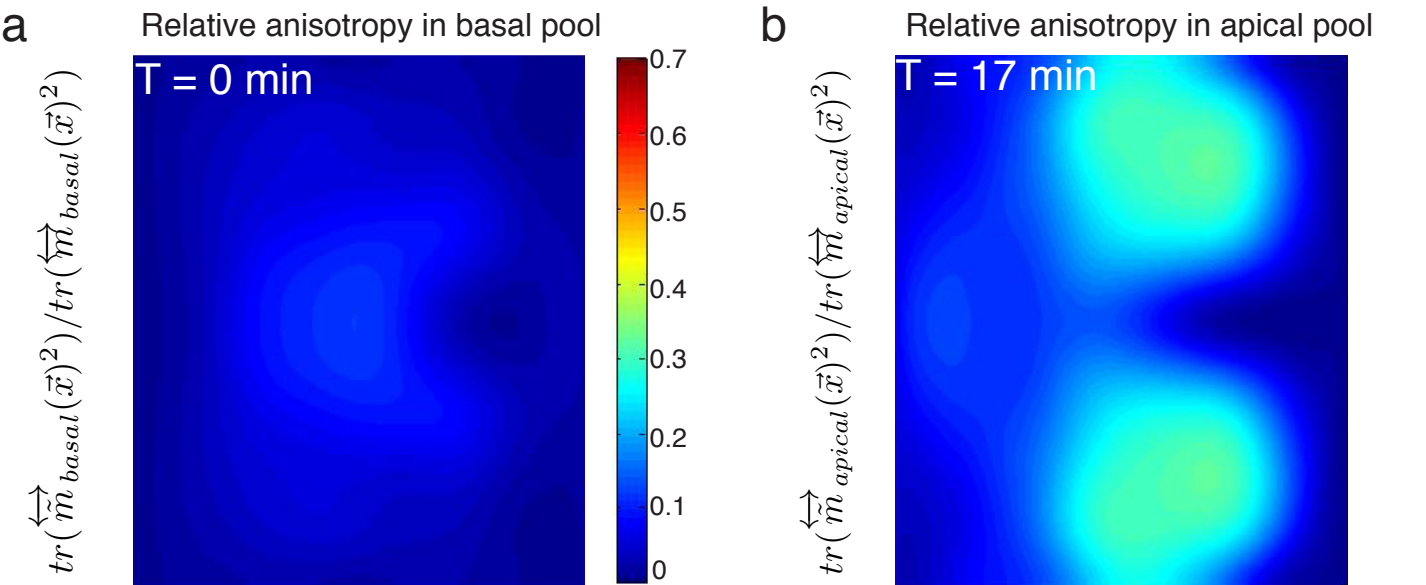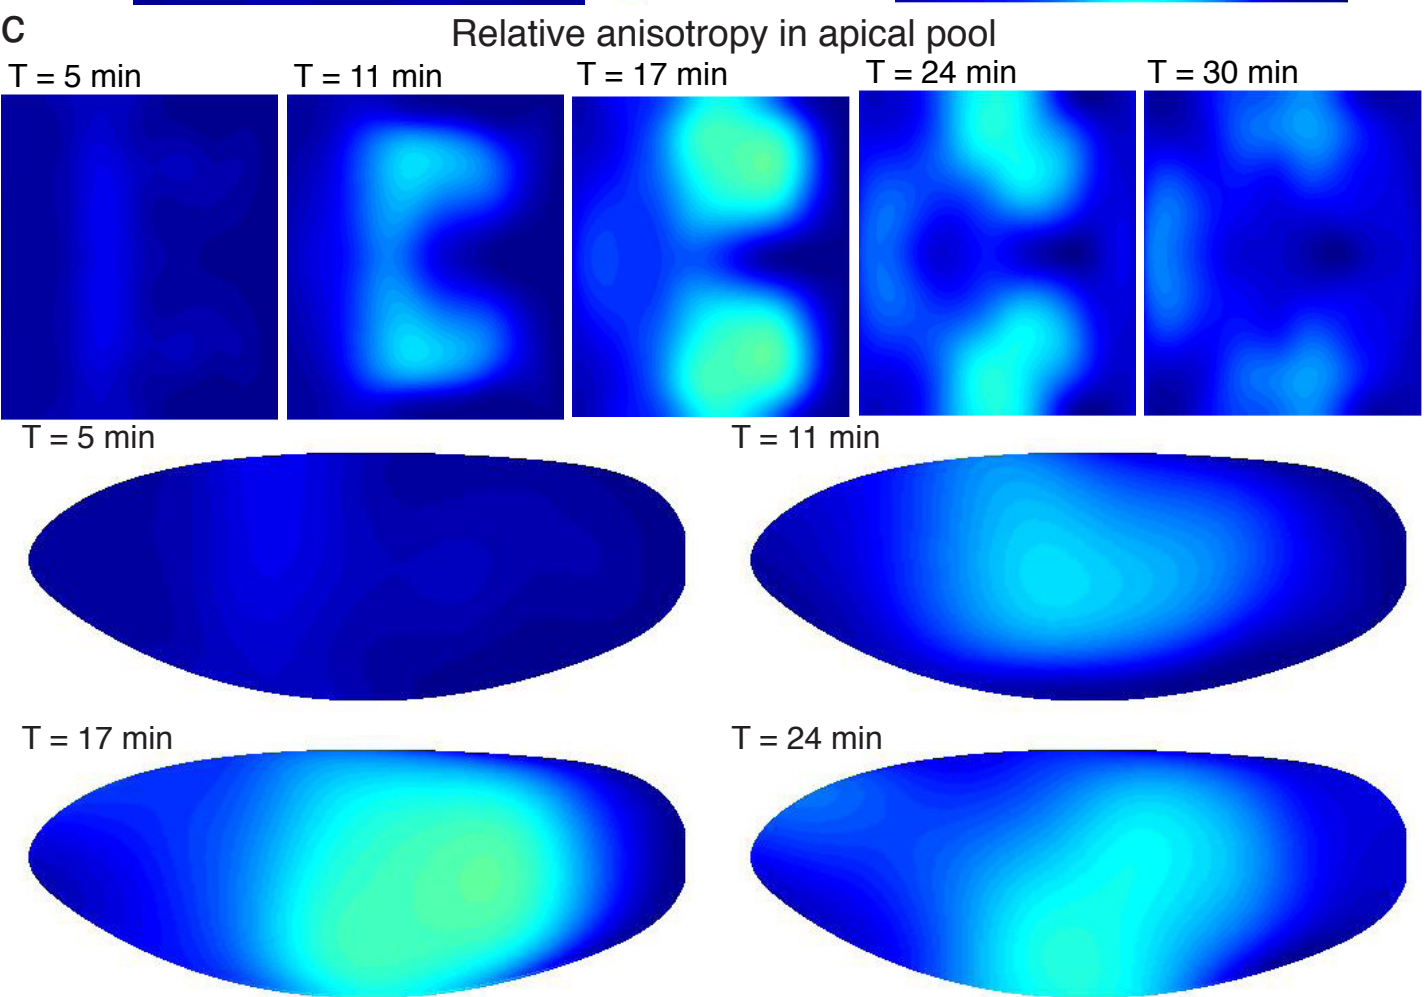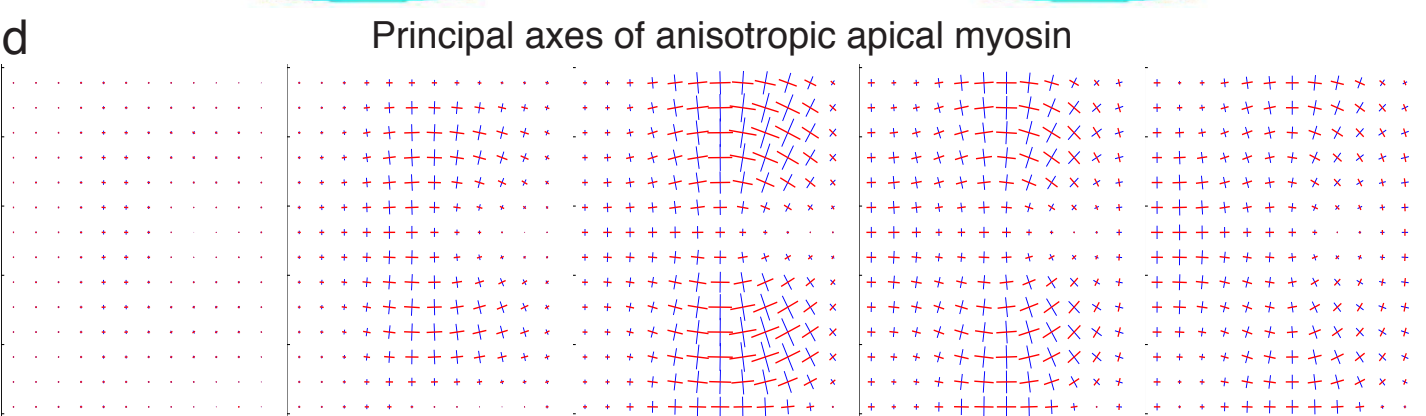

Supplement: supp [file elife-27454-supp-v1.zip › elife_poa_e27454_Figure_2_figure_supplement_4.pdf]

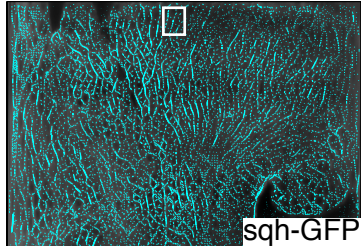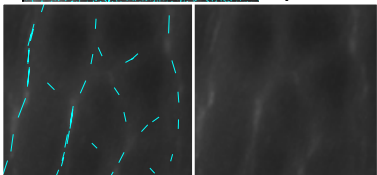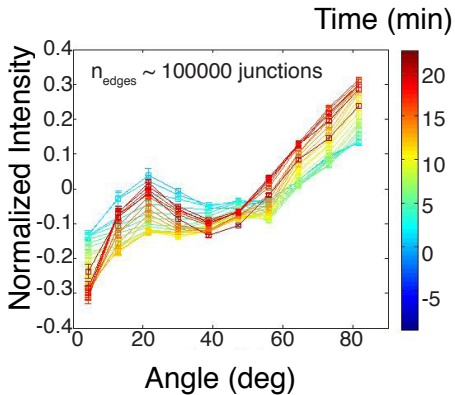

Supplement: supp [file elife-27454-supp-v1.zip › elife_poa_e27454_Figure_2_figure_supplement_2.pdf]
